# Supplementary material
Source: PubMed Central journal article supplement (PMC4183210)
Supplement: NIHMS630245-supplement-Supp_FigureS1-S2.pdf [file NIHMS630245-supplement-Supp_FigureS1-S2.pdf]

Pathology Image Detail

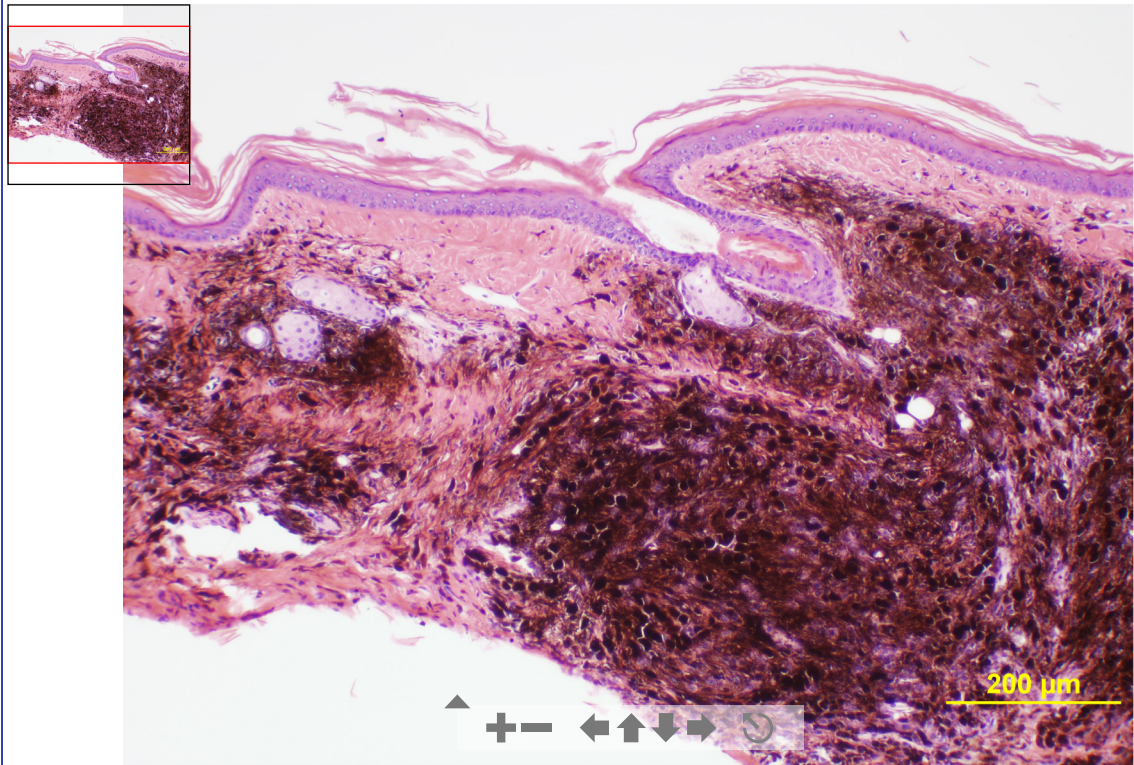

|                        |                                                                                                                                                                                                                                                                                                                                                       |
|------------------------|-------------------------------------------------------------------------------------------------------------------------------------------------------------------------------------------------------------------------------------------------------------------------------------------------------------------------------------------------------|
| <b>Caption</b>         | Image submitted by John Sundberg, the Jackson laboratory. Image is a 10x image, 10x, that is a higher magnification of the center region of the 2.5x image.                                                                                                                                                                                           |
| <b>Description</b>     | tail skin melanoma                                                                                                                                                                                                                                                                                                                                    |
| <b>Age at Necropsy</b> | 172 days                                                                                                                                                                                                                                                                                                                                              |
| <b>Notes</b>           | This is a locally invasive melanoma that originated in the dorsal tail skin of an Lt.B6 Line E female mouse. Tumor has been shown to be transplantable. Details and additional images of this tumor have been published in Dadras SS, Silva KA, King Jr LE <i>et al. J Invest Dermatol</i> advance online publication 2014; doi: 10.1038/jid.2014.47. |
| <b>Contributor</b>     | Sundberg J ( <a href="#">J:94307</a> )                                                                                                                                                                                                                                                                                                                |
| <b>Pathologist</b>     | Sundberg J ( <a href="#">J:94307</a> )                                                                                                                                                                                                                                                                                                                |

|                       |                           |
|-----------------------|---------------------------|
| <b>MTB ID</b>         | <a href="#">MTB:63654</a> |
| <b>Tumor Name</b>     | <b>Skin melanoma</b>      |
| <b>Treatment Type</b> | None (spontaneous)        |
| <b>Tumor Synonyms</b> | tail skin melanoma        |
| <b>Organ Affected</b> | Tail                      |
| <b>Frequency</b>      | observed                  |
| <b>Reference</b>      | <a href="#">J:94307</a>   |

|                            |                                                                                                                            |
|----------------------------|----------------------------------------------------------------------------------------------------------------------------|
| <b>Strain</b>              | <b>LT.B6</b><br>Strain Types: congenic<br>General Note: The genetic background of these mice was congenic LT/Sv. C57BL/6J. |
| <b>Strain Synonyms</b>     | line E                                                                                                                     |
| <b>Strain Sex</b>          | Female                                                                                                                     |
| <b>Reproductive Status</b> | reproductive status not specified                                                                                          |
| <b>Age of Detection</b>    | 172 days                                                                                                                   |

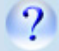

## PDX Model Details

Request more information on this PDX model.

| <b>Model Details</b>          | <b>Model ID:</b> TM00281                                                                                                                                                                                                                                                                                                                                                                                                                                                     | <b>Previous ID:</b> SK0059F            | <b>Medical Record Number:</b> 0059       |          |                                           |                  |     |                    |     |                  |     |                  |     |
|-------------------------------|------------------------------------------------------------------------------------------------------------------------------------------------------------------------------------------------------------------------------------------------------------------------------------------------------------------------------------------------------------------------------------------------------------------------------------------------------------------------------|----------------------------------------|------------------------------------------|----------|-------------------------------------------|------------------|-----|--------------------|-----|------------------|-----|------------------|-----|
|                               | <b>Primary Site:</b> Skin                                                                                                                                                                                                                                                                                                                                                                                                                                                    | <b>Diagnosis:</b> Melanoma             |                                          |          |                                           |                  |     |                    |     |                  |     |                  |     |
|                               | <b>Tumor Site:</b> Lung                                                                                                                                                                                                                                                                                                                                                                                                                                                      | <b>Tumor Type:</b> Not Specified       | <b>Stage / Grade:</b> /                  |          |                                           |                  |     |                    |     |                  |     |                  |     |
| <b>Patient</b>                | <b>Sex:</b> Male                                                                                                                                                                                                                                                                                                                                                                                                                                                             | <b>Age:</b> 86                         | <b>Race / Ethnicity:</b> White / Unknown |          |                                           |                  |     |                    |     |                  |     |                  |     |
| <b>Engraftment Host</b>       | <b>Strain:</b> <a href="#">NSG(NOD scid gamma)</a>                                                                                                                                                                                                                                                                                                                                                                                                                           | <b>Implantation Site:</b> Subcutaneous | <b>Sample Type:</b> Fragment             |          |                                           |                  |     |                    |     |                  |     |                  |     |
| <b>Variant Summary</b>        | No variant summary currently available.                                                                                                                                                                                                                                                                                                                                                                                                                                      |                                        |                                          |          |                                           |                  |     |                    |     |                  |     |                  |     |
| <b>Gene Expression</b>        | <a href="#">Click to expand/collapse</a>                                                                                                                                                                                                                                                                                                                                                                                                                                     |                                        |                                          |          |                                           |                  |     |                    |     |                  |     |                  |     |
| <b>Gene CNV</b>               | <a href="#">Click to expand/collapse</a>                                                                                                                                                                                                                                                                                                                                                                                                                                     |                                        |                                          |          |                                           |                  |     |                    |     |                  |     |                  |     |
| <b>Model Characterization</b> | <b>Histology:</b><br>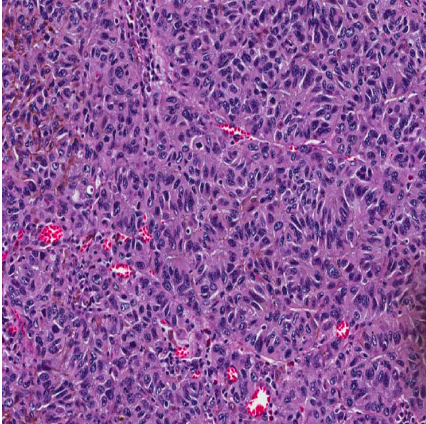<br>Patient tumor for PDX model TM00281 (aka, SK0059F)                                                                                                                                                                                                                                                                                                                |                                        |                                          |          |                                           |                  |     |                    |     |                  |     |                  |     |
|                               | <br>P0 tumor #741 for PDX model TM00281 (aka, SK0059F)                                                                                                                                                                                                                                                                                                                                    |                                        |                                          |          |                                           |                  |     |                    |     |                  |     |                  |     |
| <b>Tumor Growth Rate:</b>     | <b>Growth Characteristics of Skin Cancer PDX Models</b><br> <table border="1"><thead><tr><th>Model ID</th><th>Mean Time to ~1000 mm<sup>2</sup> (Days)</th></tr></thead><tbody><tr><td>TM00283 (SK0506)</td><td>~95</td></tr><tr><td>TM00339 (SK129862)</td><td>~60</td></tr><tr><td>TM00281 (SK0059)</td><td>~50</td></tr><tr><td>TM00282 (SK0068)</td><td>~35</td></tr></tbody></table> |                                        |                                          | Model ID | Mean Time to ~1000 mm <sup>2</sup> (Days) | TM00283 (SK0506) | ~95 | TM00339 (SK129862) | ~60 | TM00281 (SK0059) | ~50 | TM00282 (SK0068) | ~35 |
| Model ID                      | Mean Time to ~1000 mm <sup>2</sup> (Days)                                                                                                                                                                                                                                                                                                                                                                                                                                    |                                        |                                          |          |                                           |                  |     |                    |     |                  |     |                  |     |
| TM00283 (SK0506)              | ~95                                                                                                                                                                                                                                                                                                                                                                                                                                                                          |                                        |                                          |          |                                           |                  |     |                    |     |                  |     |                  |     |
| TM00339 (SK129862)            | ~60                                                                                                                                                                                                                                                                                                                                                                                                                                                                          |                                        |                                          |          |                                           |                  |     |                    |     |                  |     |                  |     |
| TM00281 (SK0059)              | ~50                                                                                                                                                                                                                                                                                                                                                                                                                                                                          |                                        |                                          |          |                                           |                  |     |                    |     |                  |     |                  |     |
| TM00282 (SK0068)              | ~35                                                                                                                                                                                                                                                                                                                                                                                                                                                                          |                                        |                                          |          |                                           |                  |     |                    |     |                  |     |                  |     |
|                               | Growth characteristics of skin cancer PDX models                                                                                                                                                                                                                                                                                                                                                                                                                             |                                        |                                          |          |                                           |                  |     |                    |     |                  |     |                  |     |
